# Supplementary material for: A direct determination of a glucose–arsenic complex by electrospray ionization time of flight mass spectrometry
Source: Royal Society of Chemistry journal article supplement (doi:10.1039/c1mt00045d), 2011-01-01

**Figure S1.** HPLC chromatogram profile of glucose and G-As complex. Chromatogram obtained from glucose and glucose-arsenite solution indicating blue and red colour respectively.

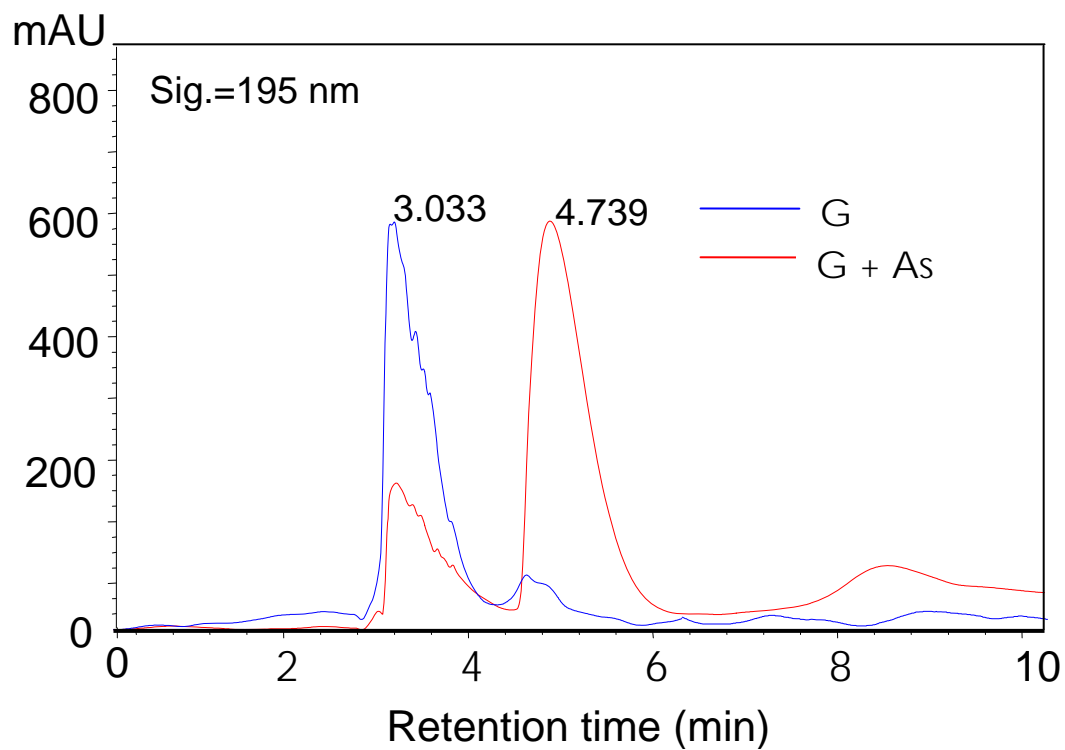

**Figure S2.** FT IR spectra of G-As complex in the 650-800  $\text{cm}^{-1}$  on  $\text{CaF}_2$  substrate. Spectrum of glucose (black color), arsenite (blue color) and glucose-arsenic complex (red color) were overlaid, respectively.

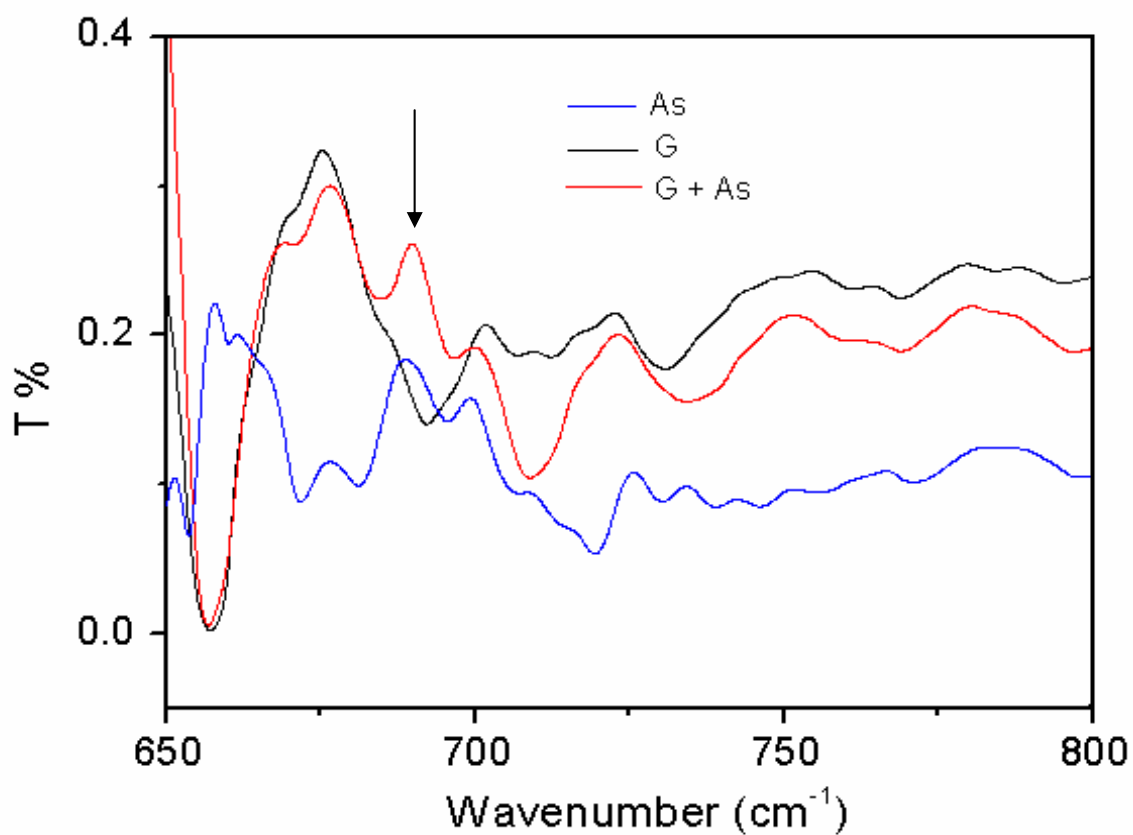

Supplement: c1mt00045d.pdf [file c1mt00045d.pdf]
